# Supplementary material for: Spatio-temporal changes in China's mainland shorelines over 30 years using Landsat time series data (1990–2019)
Source: Copernicus journal article supplement (doi:10.5194/essd-16-5311-2024), 2024-11-20
Supplement: Supplementary file 1 [file essd-16-5311-2024-supplement.zip]

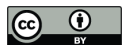

## *Supplement of*

# **Spatio-temporal changes in China's mainland shorelines over 30 years using Landsat time series data (1990–2019)**

**Gang Yang et al.**

*Correspondence to:* Weiwei Sun ([sunweiwei@nbu.edu.cn](mailto:sunweiwei@nbu.edu.cn))

- [essd-16-5311-2024-supplement-title-page.pdf](#)

- Dataset

- DSAS-BHB-YREZ

- \* Baselines.cpg
- \* Baselines.dbf
- \* Baselines.prj
- \* Baselines.sbn
- \* Baselines.sbx
- \* Baselines.shp
- \* Baselines.shp.xml
- \* Baselines.shx
- \* Transect.cpg
- \* Transect.dbf
- \* Transect.prj
- \* Transect.sbn
- \* Transect.sbx
- \* Transect.shp
- \* Transect.shp.xml
- \* Transect.shx
- \* Transect\_intersect.cpg
- \* Transect\_intersect.dbf
- \* Transect\_intersect.prj
- \* Transect\_intersect.sbn
- \* Transect\_intersect.sbx
- \* Transect\_intersect.shp
- \* Transect\_intersect.shp.xml
- \* Transect\_intersect.shx

- \* Transect\_rates.cpg
- \* Transect\_rates.dbf
- \* Transect\_rates.prj
- \* Transect\_rates.sbn
- \* Transect\_rates.sbx
- \* Transect\_rates.shp
- \* Transect\_rates.shp.xml
- \* Transect\_rates.shx

– DSAS-PREZ

- \* Baselines.cpg
- \* Baselines.dbf
- \* Baselines.prj
- \* Baselines.sbn
- \* Baselines.sbx
- \* Baselines.shp
- \* Baselines.shp.xml
- \* Baselines.shx
- \* Transect.cpg
- \* Transect.dbf
- \* Transect.prj
- \* Transect.sbn
- \* Transect.sbx
- \* Transect.shp
- \* Transect.shp.xml
- \* Transect.shx
- \* Transect\_intersect.cpg
- \* Transect\_intersect.dbf
- \* Transect\_intersect.prj
- \* Transect\_intersect.sbn
- \* Transect\_intersect.sbx
- \* Transect\_intersect.shp
- \* Transect\_intersect.shp.xml
- \* Transect\_intersect.shx
- \* Transect\_rates.cpg
- \* Transect\_rates.dbf
- \* Transect\_rates.prj
- \* Transect\_rates.sbn
- \* Transect\_rates.sbx
- \* Transect\_rates.shp
- \* Transect\_rates.shp.xml
- \* Transect\_rates.shx

– DSAS-YRE-HZBZ

- \* Baselines.cpg
- \* Baselines.dbf
- \* Baselines.prj
- \* Baselines.sbn
- \* Baselines.sbx

- \* Baselines.shp
- \* Baselines.shp.xml
- \* Baselines.shx
- \* Transect.cpg
- \* Transect.dbf
- \* Transect.prj
- \* Transect.sbn
- \* Transect.sbx
- \* Transect.shp
- \* Transect.shp.xml
- \* Transect.shx
- \* Transect\_intersect.cpg
- \* Transect\_intersect.dbf
- \* Transect\_intersect.prj
- \* Transect\_intersect.sbn
- \* Transect\_intersect.sbx
- \* Transect\_intersect.shp
- \* Transect\_intersect.shp.xml
- \* Transect\_intersect.shx
- \* Transect\_rates.cpg
- \* Transect\_rates.dbf
- \* Transect\_rates.prj
- \* Transect\_rates.sbn
- \* Transect\_rates.sbx
- \* Transect\_rates.shp
- \* Transect\_rates.shp.xml
- \* Transect\_rates.shx

– readme.docx

The copyright of individual parts of the supplement might differ from the article licence.
